# Supplementary material for: Nano-MOF@defected film C3N4 Z-scheme composite for visible-light photocatalytic nitrogen fixation
Source: Royal Society of Chemistry journal article supplement (doi:10.1039/d0ra03562a), 2020-01-01
Supplement: d0ra03562a1.pdf [file d0ra03562a1.pdf]

## Nano-MOF@Defected Film $C_3N_4$ Z-scheme Composite for Visible-light Photocatalytic Nitrogen Fixation

Zhu Ding, Shuo Wang, Xue Chang, Dan-Hong Wang\*, Tianhao Zhang\*

School of Materials Science and Engineering, School of physics & Tianjin Key Laboratory of Photonics Materials and Technology for Information Science, Nankai University, Tianjin 300350, China.

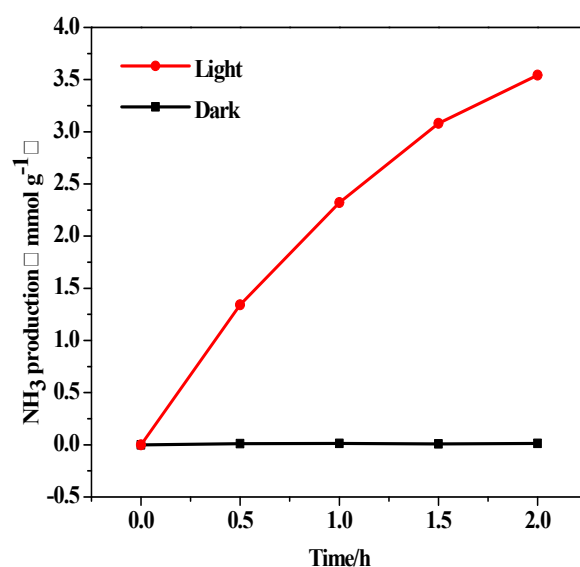

**Figure S1.** Photocatalytic nitrogen fixation activity for MOF@DF- $C_3N_4$  under light irradiation and no light irradiation .

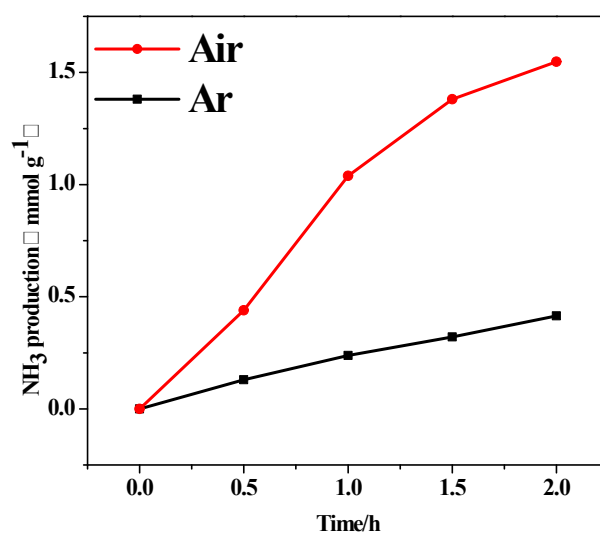

**Figure S2.** Visible light photocatalytic nitrogen fixation activity for DF-C<sub>3</sub>N<sub>4</sub> under Ar and air.

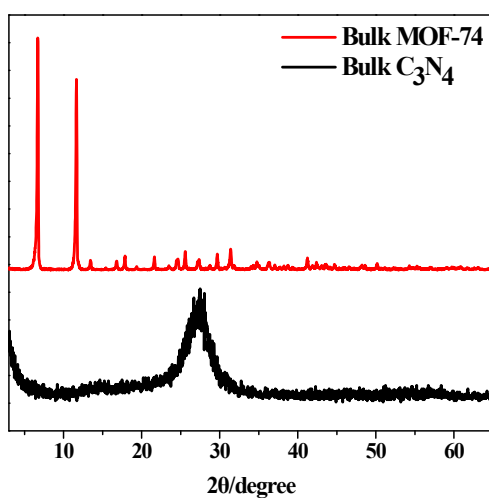

**Figure S3.** X-ray diffraction patterns of bulk MOF-74 and bulk-C<sub>3</sub>N<sub>4</sub>.

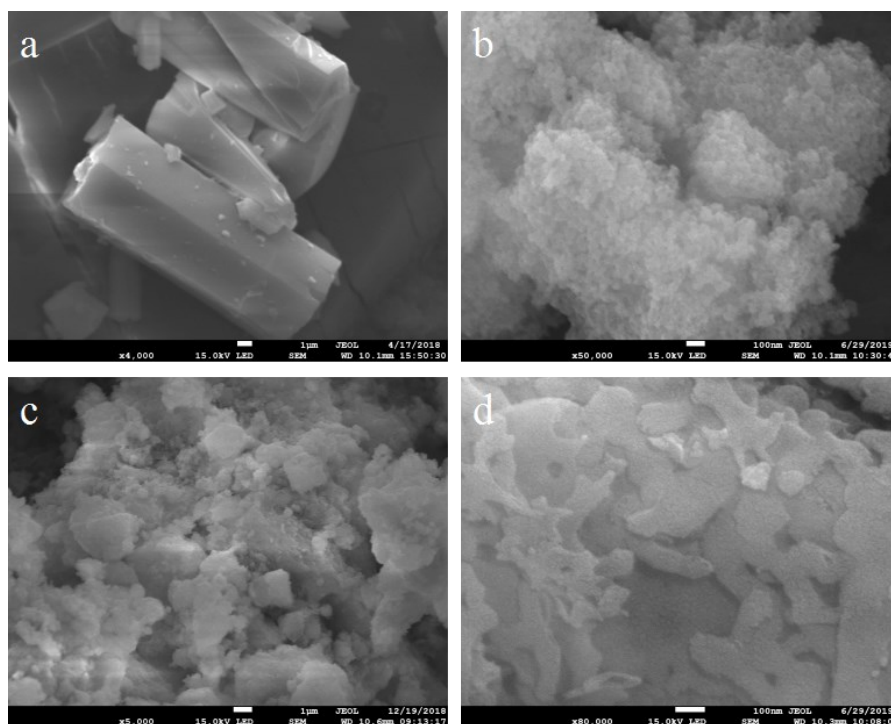

**Figure S4.** SEM images of bulk Zn-MOF-74(a), Nano-MOF-74(b), Bulk-C<sub>3</sub>N<sub>4</sub>(c) and DF-C<sub>3</sub>N<sub>4</sub>(d).

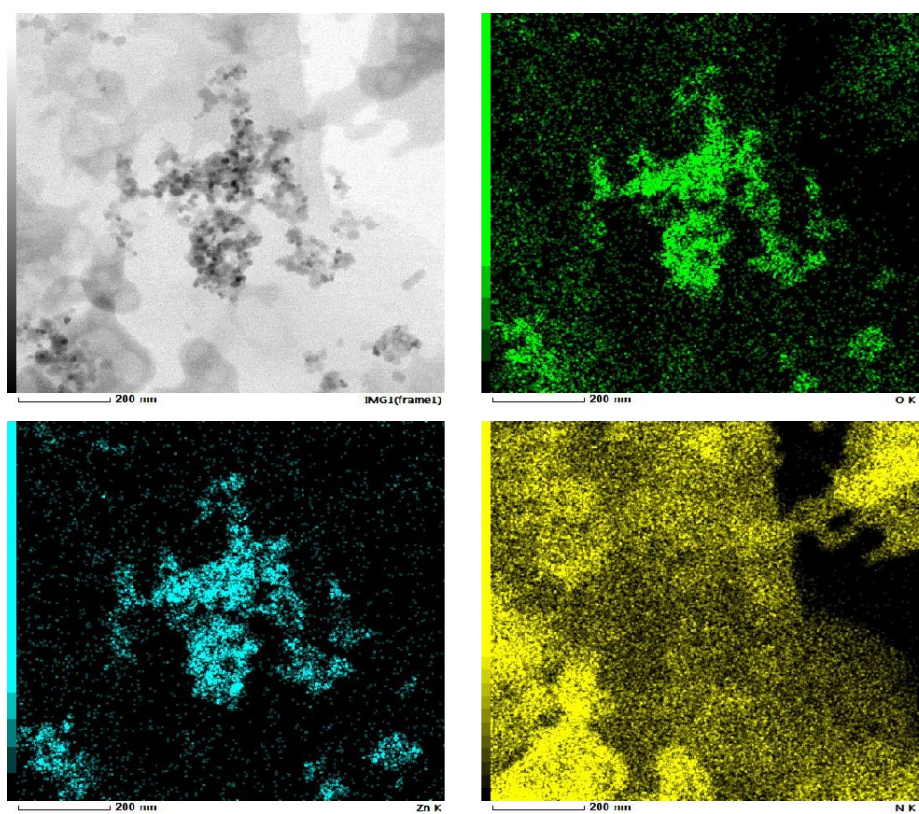

**Figure S5.** TEM element mapping images for Nano-MOF-74@Film-C<sub>3</sub>N<sub>4</sub>.

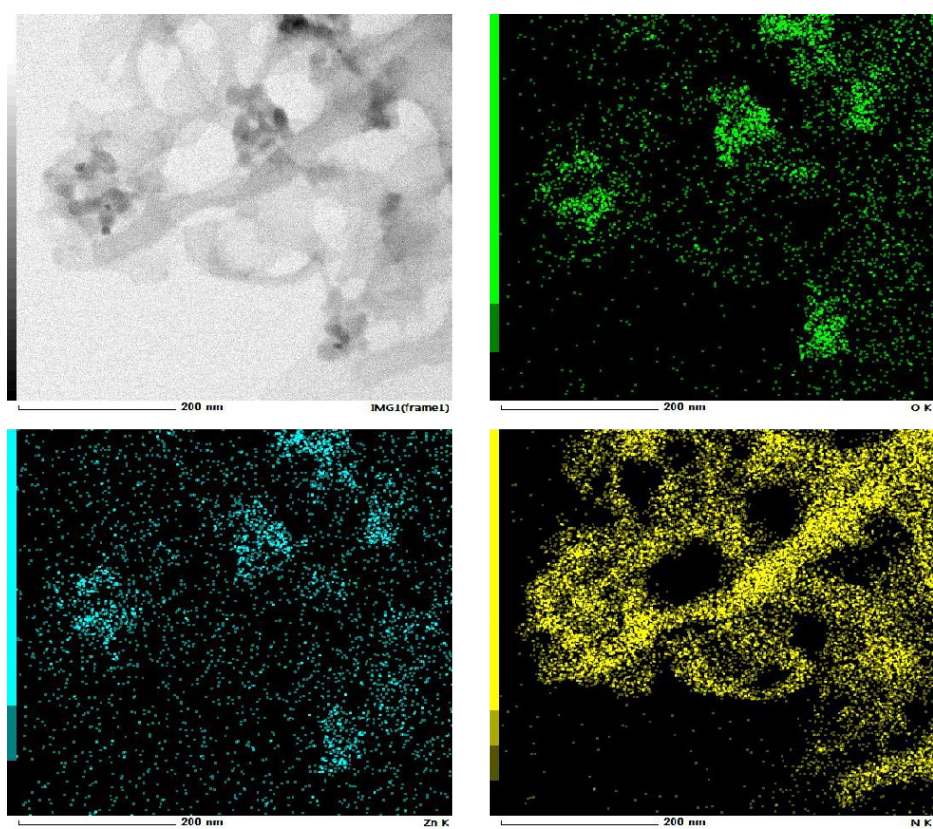

**Figure S6.** TEM element mapping images for Nano-MOF-74@DF-C<sub>3</sub>N<sub>4</sub>.

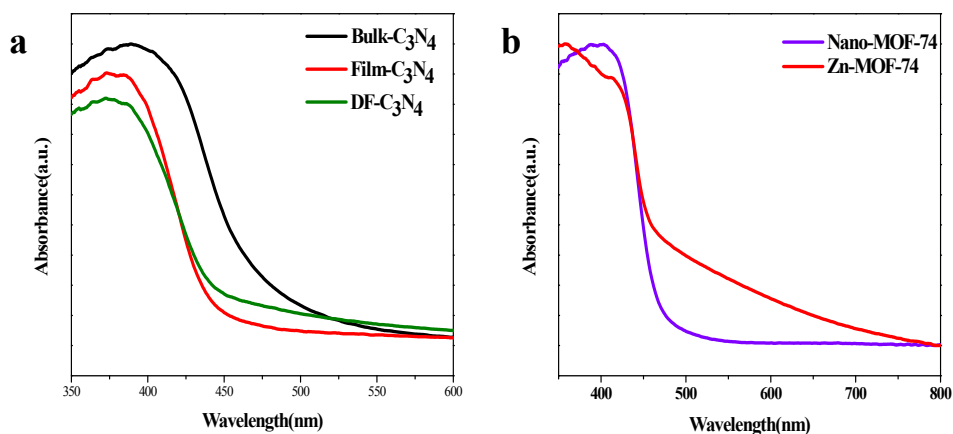

**Figure S7.** (a)UV-vis light absorption spectra of Bulk-C<sub>3</sub>N<sub>4</sub>,Film-C<sub>3</sub>N<sub>4</sub> and DF-C<sub>3</sub>N<sub>4</sub>,(b)Nano-MOF-74 and Zn-MOF-74.

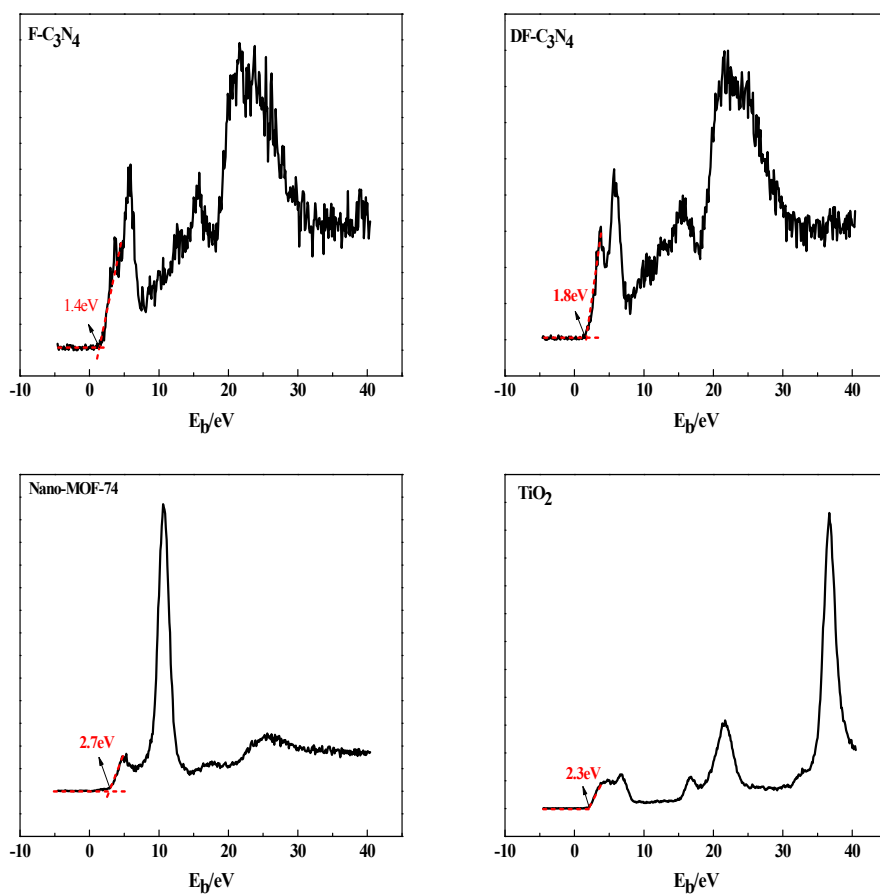

**Figure S8.** Valence band XPS spectra of F-C<sub>3</sub>N<sub>4</sub>(a),DF-C<sub>3</sub>N<sub>4</sub>(b),Nano-MOF-74(c) and TiO<sub>2</sub>(d).

The valence band position of TiO<sub>2</sub> (vs.NHE) is 3.0eV, and the actual measured valence band position is 2.3eV, so the valence band position of F-C<sub>3</sub>N<sub>4</sub>,DF-C<sub>3</sub>N<sub>4</sub> and

Nano-MOF-74 should be modified by adding 0.7eV. The valence band position of F-C<sub>3</sub>N<sub>4</sub>, DF-C<sub>3</sub>N<sub>4</sub> and Nano-MOF-74 should be 2.1eV, 2.5eV and 3.4eV.

**Table S1.** The absolute nitrogen concentration of different photocatalysts obtained from Elemental Analysis.

| Sample                             | Mass Ratio |       |
|------------------------------------|------------|-------|
|                                    | N%         | C%    |
| Bulk-C <sub>3</sub> N <sub>4</sub> | 60.43      | 34.36 |
| F-C <sub>3</sub> N <sub>4</sub>    | 58.84      | 33.56 |
| DF-C <sub>3</sub> N <sub>4</sub>   | 57.95      | 33.93 |

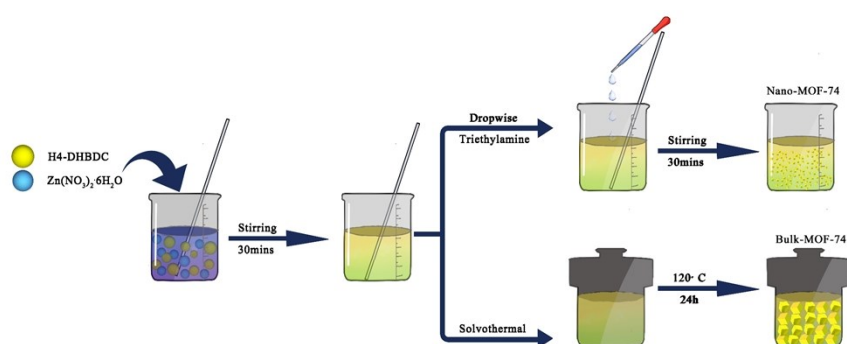

**Scheme S1.** The difference between the synthesis method of Nano-MOF-74 and the conventional procedure.

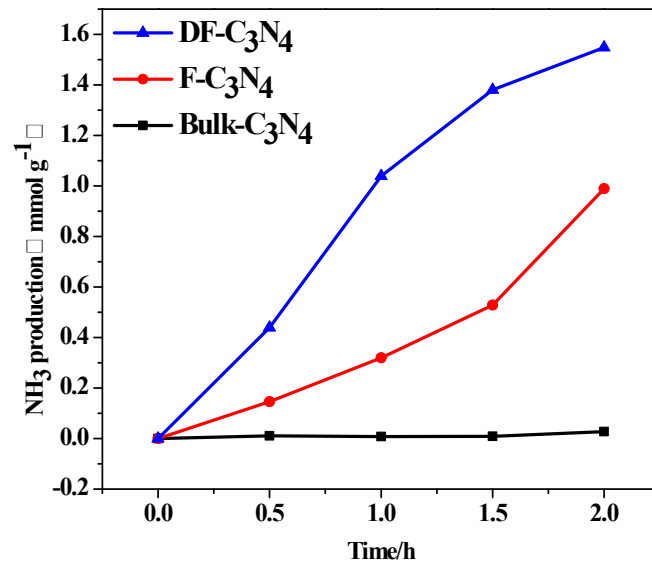

**Figure S9.** Photocatalytic nitrogen fixation activity for DF-C<sub>3</sub>N<sub>4</sub>, F-C<sub>3</sub>N<sub>4</sub> and Bulk-C<sub>3</sub>N<sub>4</sub>.
